# Supplementary material
Source: PubMed Central journal article supplement (PMC5029220)
Supplement: ismej2015193x1.pdf [file ismej2015193x1.pdf]

## Supplementary Information

### Mathematical model

Stochastic simulations were carried out based on the interactions and biochemical reactions sketched in Figure 2B of the main text using Gillespie's algorithm (Gillespie, 1977) and custom scripts programmed in FORTRAN. The biochemical reactions and parameters for the stochastic model of the *Pr/Pu* system are the following:

#### 1.- *xylR*-mRNA transcription from different *Pr* promoter states

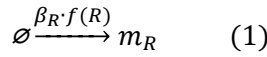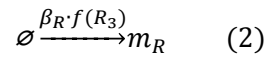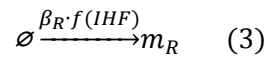

where  $\beta_R$  is the basal transcription rate from the free *Pr* promoter, and  $f(R)$ ,  $f(R_3)$  and  $f(IHF)$  are Hill functions accounting for the inhibitory action of Ri, Ra and IHF on the *Pr* promoter (Figure 2). Following standard models of transcription regulation (Bintu *et al.*, 2005), we assume the general form:

$$f(x) = \frac{1 + \frac{x}{f_x \theta_x}}{1 + \frac{x}{\theta_x}}$$

where  $\theta_x$  is the threshold for the regulatory action of the species  $x$  and  $f_x$  the fold-change in expression of the regulated species. The basal transcription rates were assumed to be between 35-85 nt/s in exponential phase (Vogel and Jensen, 1994). Specifically,  $\beta_R$  was assigned a value of 80 nt/s to match measured XylR levels in exponential phase (Fraile *et al.*, 2001). Transcription rates in stationary phase were assumed ~2-3 times slower than in exponential phase (Proshkin *et al.*, 2010). Fold-change values for negative autoregulation by Ri/Ra ( $f_R$  and  $f_{R_3}$  respectively), as well as for IHF repression ( $f_{IHF}$ ) were taken from experimental observations (Fraile *et al.*, 2001; Silva-Rocha and de Lorenzo, 2011), while thresholds  $\theta_x$  were set to match the desired response taking into account XylR and IHF levels. All parameter values and references are listed in Table 1 of the main text.

## 1 2.- Translational repression of XylR by Crc

2

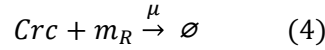

3

4 where  $\mu$  is the association constant for Crc and *xylR*-mRNA.

5

## 6 3.- XylR activation/inactivation

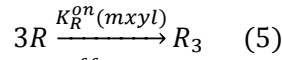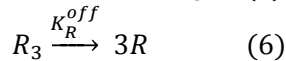

7

8 where the effective association constant for Ri dimers ( $K_R^{on}$ ) depends on the presence of the inducer *m*-

9 xylene. Here we assume the general Michaelis-Menten form

10

$$K_R^{on}(m_{xyl}) = k_R \frac{1 + \frac{m_{xyl}}{f_m \theta_m}}{1 + \frac{m_{xyl}}{\theta_m}}$$

11

12 where the activation constant in the absence of inducer,  $k_R$ , should be very small to account for the fact13 that expression of *Pu* in non-inducing conditions ( $m_{xyl} = 0$ ) is practically shut off (Silva-Rocha and de14 Lorenzo, 2012). The induction strength  $f_m$  mainly affects the fold-change observed in *Pu* expression15 after exposure to *m*-*xyl* and is adjusted to reproduce experimental observations. The ratio  $m_{xyl}/\theta_m$  is16 chosen large, to reflect the fact that cells are exposed to saturating vapors of *m*-xylene in the induced17 state. The inactivation constant  $K_R^{off}$  modulates the presence of transcription bursts in *xylR*-mRNA, and18 affects the 'leakage' between the low and high expression peaks of *Pu*-GFP in the bimodal distributions.

19

20 4.- *Pu* activation/inactivation by XylR

21

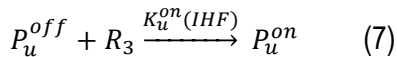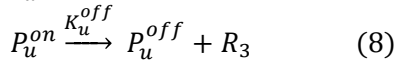

23

24 where the activation rate  $K_u^{on}(IHF)$  depends on the amount of the regulator IHF available to the *Pu*25 promoter, as both IHF and Ri are necessary for *Pu* transcription (Silva-Rocha and de Lorenzo, 2011).

26

Again, we consider a phenomenological activation rate as

$$K_u^{on}(IHF) = k_u \frac{1 + \frac{IHF}{f_u \theta_u}}{1 + \frac{IHF}{\theta_u}}$$

The dissociation constant  $K_u^{off}$  is assumed to be independent of IHF for simplicity. Note that all effects due to IHF binding/unbinding can be included in the effective activation rate  $K_u^{on}(IHF)$  by appropriately choosing the parameters. The parameters  $k_u$  and  $K_u^{off}$  control the induction time of the GFP distributions as well as the transcription bursts in *Pu-GFP* mRNA. In our model,  $f_u$  is fixed to mimic the experimental fold-change in *Pu* activity (Valls *et al.*, 2002) while  $k_u$  and  $K_u^{off}$  are adjusted to reproduce the observed behavior in the stochastic distributions in exponential phase.

#### 5.- *Pu-GFP* transcription

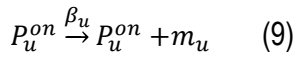

#### 6.- *XylR* and *GFP* translation

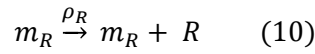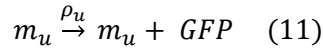

Translation rates may also be 2-3 times slower in stationary phase compared to exponential phase (Proshkin *et al.*, 2010). We considered values in the range 5-20 aa/s, and adjusted *XylR* translation rate ( $\rho_R$ ) to achieve the experimentally observed levels in exponential and stationary phases (Fraile *et al.*, 2001).

#### 7.- mRNA and protein degradation

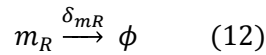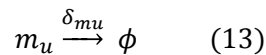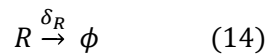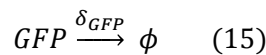

Typical mRNA half-lives in bacteria are between 2-10 min (Bernstein *et al.*, 2002; Taniguchi *et al.*, 2010). *Ri* and *GFP* proteins are stable and degradations assumed to be dominated by cell growth and

1 dilution in exponential phase,  $\delta_{R,GFP} \sim \ln 2 / \tau_d$ , where  $\tau_d$  is the cell division time, which is about 40  
2 mins (Fonseca *et al.*, 2011).

3  
4 All these reactions were included into Gillespie's algorithm (Gillespie, 1977) to simulate the stochastic  
5 time evolution of the different molecular species. Distributions of *Pu-GFP* levels for different parameters  
6 and growth state were obtained running ensembles of 20,000 stochastic trajectories and recording the  
7 number of GFP molecules at different induction times. To mimic experimental fluorescence background  
8 we added a constant production rate of GFP (100 molec./h).

### 9 10 *Parameter fitting*

11  
12 All parameters that were not directly taken from previous experimental data were manually adjusted with  
13 the following procedure: First, we estimated some parameters values/ranges using deterministic models  
14 (see below). For instance, Crc levels were adjusted in exponential phase to give deterministic (average)  
15 values of XylR protein in agreement with previous experimental measurements (Fraile *et al.*, 2001), that  
16 is, ~15 Ri dimers. Then, for stationary phase we decreased 4-fold Crc levels, as observed  
17 experimentally (Ruiz-Manzano *et al.*, 2005; Silva-Rocha and de Lorenzo, 2011) and readjusted basal  
18 transcription/translation rates within physiological ranges to achieve the measured levels of XylR in  
19 stationary phase, ~60 Ri dimers (Fraile *et al.*, 2001). To estimate activation/inactivation rates of *Pr* and  
20 *Pu* promoters, we note that steady state values of the different molecular species depend only on the  
21 ratios  $K_R^{on}/K_R^{off}$  and  $K_u^{on}/K_u^{off}$ , but the induction *dynamics* (response time after induction with *m*-  
22 xylene) is sensitive to the individual rates. We used the experimental induction curve in exponential  
23 phase to delimit their values (Figure S1), which were further confirmed by simulation of the stochastic  
24 GFP distributions (Figure 3, main text). We note that these rates were unchanged in stationary phase  
25 conditions but reproduced equally well experimental induction curves and GFP distributions, validating  
26 our estimation.

### 27 28 *Deterministic equations*

29  
30 To fit some of the model parameters and compare with the stochastic simulations (Figures 3 and 5), we  
31 also implemented a deterministic ordinary differential equation model, that was solved using custom

1 scripts written in MATLAB 2011 (The Mathworks, Inc.). Reactions (1)-(15) , combined with mass action  
 2 kinetics, give the following set of ordinary differential equations for the time evolution of species  
 3 concentrations:

4

$$\begin{aligned}
 \frac{d m_R}{dt} &= \beta_R \left( \frac{1 + R/f_R \theta_R}{1 + R/\theta_R} + \frac{1 + R_3/f_{R3} \theta_{R3}}{1 + R_3/\theta_{R3}} + \frac{1 + IHF/f_{IHF} \theta_{IHF}}{1 + IHF/\theta_{IHF}} \right) - \mu \cdot CrC \cdot m_R - \delta_{mR} m_R \\
 \frac{d R}{dt} &= \rho_R m_R + 3K_R^{off} \cdot R_3 - 3K_R^{on}(mxyI) \cdot R^3 - \delta_R R \\
 \frac{d R_3}{dt} &= K_R^{on}(mxyI) \cdot R^3 + K_u^{off} P_u^{on} - K_R^{off} \cdot R_3 - K_u^{on}(IHF) P_u^{off} \cdot R_3 \\
 \frac{d P_u^{off}}{dt} &= K_u^{off} P_u^{on} - K_u^{on}(IHF) P_u^{off} \\
 \frac{d P_u^{on}}{dt} &= K_u^{on}(IHF) P_u^{off} - K_u^{off} P_u^{on} \\
 \frac{d m_u}{dt} &= \beta_u P_u^{on} - \delta_{mu} m_u \\
 \frac{d GFP}{dt} &= \rho_u m_u - \delta_{GFP} GFP \quad (16)
 \end{aligned}$$

5

6 The deterministic rate constants are the stochastic rate constants in Table 1 rescaled by cell volume  
 7 where needed. Since *Pseudomonas putida* has a volume of  $\sim 10^{-15}$  l, we assume that 1 molecule/cell  $\sim$   
 8 1nM.

9

#### 10 *Model for the lacI<sup>q</sup>-Ptrc-xyIR construct*

11

12 Expression of *xyIR mRNA* is increased and controlled by a *lacI-Ptrc* promoter and the addition of the  
 13 inducer IPTG. The LacI repressor protein binds to the *lacI* promoter at a site overlapping the binding site  
 14 of the  $\sigma^{70}$  unit of the RNAP, suppressing transcription from this promoter. LacI is deactivated by IPTG:  
 15 binding of IPTG to LacI induces a conformational change in the LacI structure, such that the complex  
 16 LacI-IPTG is unable to bind the *lacI* promoter, and transcription takes place. Within our experimental  
 17 conditions (addition of IPTG to the cells, incubation during 4h to reach mid-exponential phase and then  
 18 addition of the *m-xylene* inducer), we may assume that the concentration of LacI repressor protein  
 19 inside cells has reached stationary levels. Therefore, the concentration of LacI repressor as a function of  
 20 IPTG can be obtained as (Setty *et al.*, 2003; Yagil and Yagil, 1971):

21

$$\frac{L}{L_T} = \frac{1}{1 + \left( \frac{IPTG}{\theta_{IPTG}} \right)^2} \quad (17)$$

1

2 where  $L$  is the concentration of free LacI repressor,  $L_T$  the total amount of LacI (free plus LacI-IPTG  
 3 complex),  $IPTG$  the concentration of IPTG inducer and  $\theta_{IPTG}$  the threshold for LacI inactivation. On the  
 4 other hand, the action of the LacI repressor on *lacI-P<sub>trc</sub>* transcription can be assumed to follow a  
 5 Michaelis-Menten kinetics (Ozbudak *et al.*, 2004; Setty *et al.*, 2003). Therefore, reactions (1)-(3) for *xyIR*  
 6 transcription are replaced by

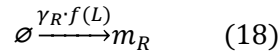

7

8 where the regulation function  $f(L)$  takes the form

9

$$f(L) = \frac{1 + \frac{L}{f_L \theta_L}}{1 + \frac{L}{\theta_L}} \quad (19)$$

10

11 Using Eq. (17) in (19), we obtain the transcription rate from the *lacI-P<sub>trc</sub>* promoter directly as a function  
 12 of the IPTG concentration:

13

14

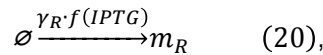

15 with

$$f(IPTG) = \frac{1 + \frac{a}{f_L} + \left(\frac{IPTG}{\theta_{IPTG}}\right)^2}{1 + a + \left(\frac{IPTG}{\theta_{IPTG}}\right)^2} \quad (21)$$

16 and  $a \equiv L_T / \theta_L$ .

17

18 To estimate the parameters in (20)-(21), we note that Eq. (21) can be related to a simpler regulation  
 19 function

20

$$\alpha_R \left(1 + \frac{IPTG}{f_{IPTG} K_{IPTG}}\right) / \left(1 + \frac{IPTG}{K_{IPTG}}\right)$$

22

23 with a threshold  $K_{IPTG}$  and a fold-change parameter  $f_{IPTG}$ , that directly represent the effect of IPTG  
 24 addition on *xyIR mRNA*. To mimic the behavior of the experimental distributions as a function of IPTG  
 25 concentration, we find that proper threshold and fold-change values for IPTG induction are  $K_{IPTG} = 75$

1  $\mu\text{M}$  and  $f_{IPTG} = 1/3$  respectively. Then, by choosing a sufficiently large value of  $a$  (LacI levels in the  
2 absence of IPTG well above repression threshold), the values of  $f_L$  and  $\theta_{IPTG}$  can be calculated as

$$3 \quad f_L = \frac{a}{f_{IPTG}(1+a) - 1}, \quad \theta_{IPTG} = \sqrt{\frac{K_{IPTG}^2 \cdot f_L \cdot (1-c)}{c \cdot f_L(1+a) - (a+f_L)'}}$$

4 where  $c \equiv (1 + f_{IPTG})/2$ . The values of  $a$ ,  $f_L$  and  $\theta_{IPTG}$  are given in Table 1. The basal transcription  
5 rate  $\gamma_R$  is chosen to reproduce the experimental observation that in the absence of IPTG, the *lacI-Ptrc*  
6 promoter produces a leak expression of  $\sim 2$ -fold that of the native *Pr* promoter (de Lorenzo *et al.*, 1993;  
7 Silva-Rocha and de Lorenzo, 2011). To summarize, the simulations for the IPTG induced *lacI-Ptrc-Pu*  
8 system were carried out with Eqs. (20)-(21) replacing Eqs. (1)-(3) for the stochastic reactions of *xylR*-  
9 mRNA transcription. The rest of the reactions and parameters were left unchanged.  
10

## 11 REFERENCES

- 12  
13  
14 Bernstein JA, Khodursky AB, Lin PH, Lin-Chao S, Cohen SN (2002). Global analysis of mRNA decay  
15 and abundance in *Escherichia coli* at single-gene resolution using two-color fluorescent DNA  
16 microarrays. *Proc Natl Acad Sci USA* **99**: 9697-9702.
- 17 Bintu L, Buchler NE, Garcia HG, Gerland U, Hwa T, Kondev J *et al* (2005). Transcriptional regulation by  
18 the numbers: models. *Curr Opin Genet Dev* **15**: 116-124.
- 19 de Lorenzo V, Eltis L, Kessler B, Timmis KN (1993). Analysis of *Pseudomonas* gene products using  
20 *lacIq/Ptrp-lac* plasmids and transposons that confer conditional phenotypes. *Gene* **123**: 17-24.
- 21 Fonseca P, Moreno R, Rojo F (2011). Growth of *Pseudomonas putida* at low temperature: global  
22 transcriptomic and proteomic analyses. *Environ Microbiol Rep* **3**: 329-339.
- 23 Fraile S, Roncal F, Fernandez LA, de Lorenzo V (2001). Monitoring intracellular levels of XylR in  
24 *Pseudomonas putida* with a single-chain antibody specific for aromatic-responsive enhancer-  
25 binding proteins. *J Bacteriol* **183**: 5571-5579.
- 26 Gillespie DT (1977). Exact stochastic simulation of coupled chemical reactions. *J Phys Chem* **81**: 2340-  
27 2361.
- 28 Ozbudak EM, Thattai M, Lim HN, Shraiman BI, Van Oudenaarden A (2004). Multistability in the lactose  
29 utilization network of *Escherichia coli*. *Nature* **427**: 737-740.
- 30 Proshkin S, Rahmouni AR, Mironov A, Nudler E (2010). Cooperation between translating ribosomes and  
31 RNA polymerase in transcription elongation. *Science* **328**: 504-508.

- 1 Ruiz-Manzano A, Yuste L, Rojo F (2005). Levels and activity of the *Pseudomonas putida* global  
2 regulatory protein Crc vary according to growth conditions. *J Bacteriol* **187**: 3678-3686.
- 3 Setty Y, Mayo AE, Surette MG, Alon U (2003). Detailed map of a *cis*-regulatory input function. *Proc Natl*  
4 *Acad Sci USA* **100**: 7702-7707.
- 5 Silva-Rocha R, de Lorenzo V (2011). A composite feed-forward loop I4-FFL involving IHF and Crc  
6 stabilizes expression of the XylR regulator of *Pseudomonas putida* mt-2 from growth phase  
7 perturbations. *Mol BioSyst* **7**: 2982-2990.
- 8 Silva-Rocha R, de Lorenzo V (2012). Stochasticity of TOL plasmid catabolic promoters sets a bimodal  
9 expression regime in *Pseudomonas putida* mt-2 exposed to *m*-xylene. *Mol Microbiol* **86**: 199-211.
- 10 Taniguchi Y, Choi PJ, Li GW, Chen H, Babu M, Hearn J *et al* (2010). Quantifying *E. coli* proteome and  
11 transcriptome with single-molecule sensitivity in single cells. *Science* **329**: 533-538.
- 12 Valls M, Buckle M, de Lorenzo V (2002). *In vivo* UV laser footprinting of the *Pseudomonas putida* sigma  
13 54Pu promoter reveals that integration host factor couples transcriptional activity to growth phase.  
14 *J Biol Chem* **277**: 2169-2175.
- 15 Vogel U, Jensen KF (1994). The RNA chain elongation rate in *Escherichia coli* depends on the growth  
16 rate. *J Bacteriol* **176**: 2807-2813.
- 17 Yagil G, Yagil E (1971). On the relation between effector concentration and the rate of induced enzyme  
18 synthesis. *Biophys J* **11**: 11-27.
- 19  
20  
21



1 **Supplementary Figure S1.** Activation/deactivation rates of XylR and *P<sub>U</sub>* promoter (control induction  
 2 times)

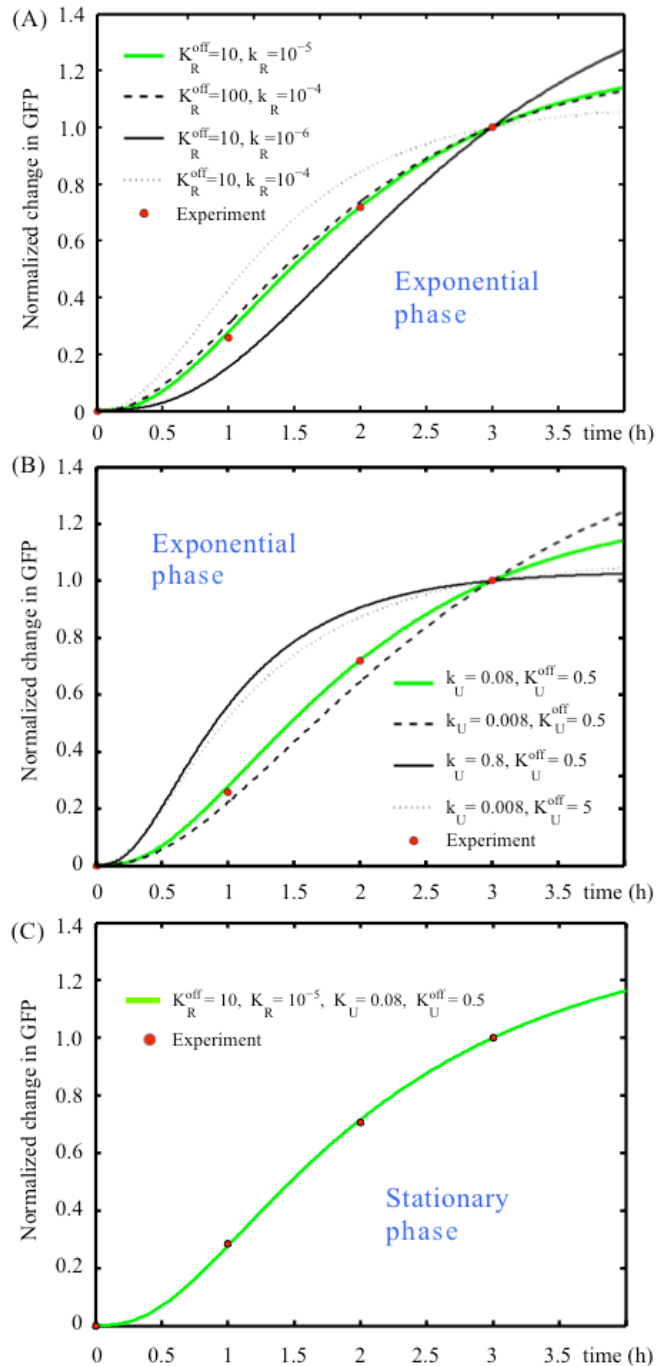

3

4 To allow for a comparison between experimental fluorescence intensities and numerical GFP levels, the  
 5 induction response is obtained as the normalized fold-change in mean GFP level as a function of time.  
 6 Red dots correspond to the experimental values, while curves are the result of simulations using the  
 7 deterministic model (Materials and Methods). (A) Effect of activation/deactivation rates for XylR  
 8 (parameters  $K_R$  and  $K_R^{off}$  respectively) on the induction response in exponential phase. (B) Effect of  
 9 activation/deactivation rates of the *P<sub>U</sub>* promoter due to Ra (parameters  $K_U$  and  $K_U^{off}$  respectively) on the  
 10 induction times in exponential phase. Green lines are obtained with the values used in all stochastic  
 11 simulations, shown in Table 1. (C) These parameters were adjusted in exponential phase, but  
 12 reproduced the experimental induction response also in stationary phase

13

1 **Supplementary Figure S2.** Releasing post-transcriptional repression of XylR reduces variability in  
 2 exponential phase.

3

4

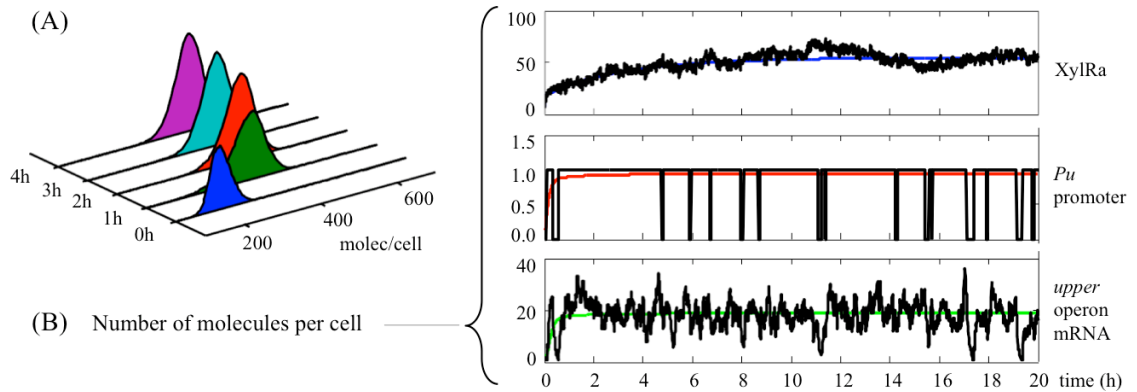

5

6 (A) Stochastic distributions of *Pu-GFP* levels in exponential phase conditions, except that Crc  
 7 abundance is decreased 4-fold (to the levels found in stationary phase). (B) Typical stochastic  
 8 trajectories showing the increase in active XylR (top panel, blue line is the average value) due to the  
 9 release of post-transcriptional repression by Crc. The *Pu* promoter undergoes relatively frequent  
 10 inactivation events but of very short duration (mid panel). This implies that *Pu mRNA* fluctuations are  
 11 fast and population responses unimodal.

12

13

14

15

16

17

18

19

20

21

22

23

24

25
